# Supplementary material for: ADP-ribosyl-N3: A Versatile Precursor for Divergent Syntheses of ADP-ribosylated Compounds
Source: PubMed Central journal article supplement (PMC6152188; doi:10.3390/molecules22081346), 2017-08-14
Supplement: molecules-22-01346-s001.pdf [file molecules-22-01346-s001.pdf]

## ADP-ribosyl-N<sub>3</sub>: A Versatile Precursor for Divergent Syntheses of ADP-ribosylated Compounds

Lingjun Li\*, Qianqian Li, Shengqiang Ding, Pengyang Xin, Yuqin Zhang, Shenlong Huang and Guisheng Zhang\*

*Collaborative Innovation Center of Henan Province for Green Manufacturing of Fine Chemicals, Key Laboratory of Green Chemical Media and Reactions, Ministry of Education, School of Chemistry and Chemical Engineering, Henan Normal University, Xinxiang, Henan 453007, P. R. China.*

|                                                                                                                 |        |
|-----------------------------------------------------------------------------------------------------------------|--------|
| The terminal alkynes <b>a</b> to <b>i</b> used in the CuAAC reaction.....                                       | S2     |
| Characterization of compound <b>7a-7i</b> and <b>9</b> .....                                                    | S3-S4  |
| Copies of <sup>1</sup> H NMR, <sup>31</sup> P NMR and <sup>13</sup> C NMR spectrums for compound <b>6</b> ..... | S5     |
| Compound <b>6</b> <sup>1</sup> H- <sup>1</sup> H COSYS.....                                                     | S6     |
| Copies of <sup>1</sup> H NMR and <sup>31</sup> P NMR spectrums for compound <b>7a</b> to <b>7i</b> .....        | S7-S11 |
| Copies of <sup>1</sup> H NMR and <sup>31</sup> P NMR spectrums for compound <b>9</b> .....                      | S11    |
| Reference.....                                                                                                  | S12    |

**Table 1.** The terminal alkynes **a** to **i** used in the CuAAC reaction.

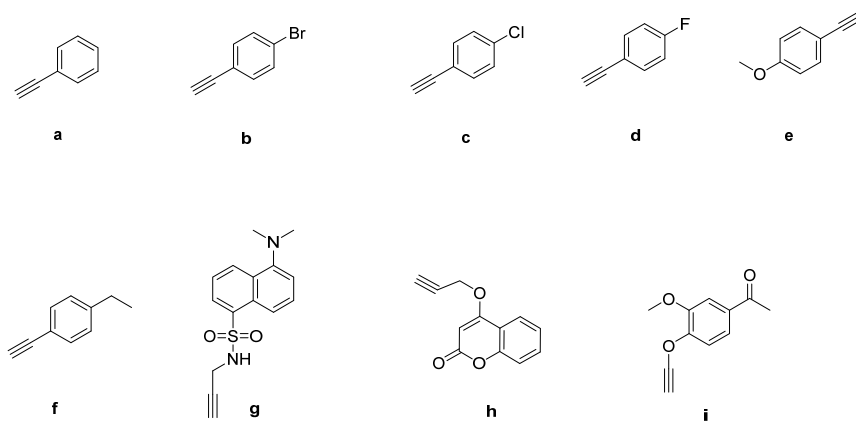

Alkyne (**a**, **b**, **c**, **d**, **e**, **f**),  $\text{CuSO}_4 \cdot 5\text{H}_2\text{O}$ , Sodium ascorbate and copper(0) from Alfa Aesar. Alkynes (**g**, **h**, and **i**) was prepared with the method used in our previous work. Alkyne **h**, **g** prepared with the method used in our previous work<sup>[1]</sup>. The compound of **i** were prepared with the following procedure: 4-hydroxy-3-methoxyacetophenone (1 mmol) was added to a stirred suspension of the bromopropyne (1.0 mmol), potassium carbonate (1mmol) in methanol (5 mL). Upon completion of the reaction (TLC), the mixture was concentrated. The crude mixture was purified by silica gel column chromatography using Ethyl acetate/ petroleum ether as eluent to give target compound.

**Characterization of compound 7a-7i:**

**Compound 7a**  $^1\text{H}$  NMR (400 MHz,  $\text{D}_2\text{O}$ )  $\delta$  8.38 (s, 1H), 8.03 (s, 1H), 7.59 (d,  $J = 7.0$  Hz, 2H), 7.42 – 7.29 (m, 3H), 6.12 (d,  $J = 4.7$  Hz, 1H), 5.83 (s, 1H), 4.66 (s, 1H), 4.51-4.56(m, 2H) 4.43 (s, 2H), 4.32 (m, 1H), 4.32-4.18(m, 4H).  $^{31}\text{P}$  NMR (162 MHz,  $\text{D}_2\text{O}$ ):  $\delta$  -11.55. HRMS (ESI)  $m/z$  calculate for  $([\text{M}+\text{H}]^+)$ :  $\text{C}_{23}\text{H}_{29}\text{N}_8\text{O}_{13}\text{P}_2^+$ : 687.1324, Found: 687.1326.

**Compound 7b**  $^1\text{H}$  NMR (600 MHz,  $\text{D}_2\text{O}$ )  $\delta$  8.27 (s, 1H), 8.12 (s, 1H), 7.86 (s, 1H), 7.55 (d,  $J = 7.8$  Hz, 2H), 7.42 (d,  $J = 7.8$  Hz, 2H), 6.44 (d,  $J = 4.8$  Hz, 1H), 5.84 (d,  $J = 5.0$  Hz, 1H), 4.64 (t,  $J = 4.7$  Hz, 1H), 4.57 (s, 1H), 4.50 (d,  $J = 4.7$  Hz, 2H), 4.44 (s, 1H), 4.36 (s, 2H), 4.28 (s, 2H), 4.16-4.14 (m, 1H).  $^{31}\text{P}$  NMR (162 MHz,  $\text{D}_2\text{O}$ ):  $\delta$  -11.71. HRMS (ESI)  $m/z$  calculate for  $([\text{M}+\text{H}]^+)$ :  $\text{C}_{23}\text{H}_{28}\text{BrN}_8\text{O}_{13}\text{P}_2^+$ : 765.0429, Found: 765.0431.

**Compound 7c**  $^1\text{H}$  NMR (600 MHz,  $\text{D}_2\text{O}$ )  $\delta$  8.40 (s, 1H), 8.20 (s, 1H), 8.01 (s, 1H), 7.52-7.51 (m, 2H), 7.31-7.30 (m, 2H), 6.15-6.14 (m, 1H), 5.79-5.78 (M, 1H), 4.65 (s, 1H), 4.51 (s, 2H), 4.44 (s, 1H), 4.40 (s, 1H), 4.32 – 4.30 (m, 4H), 4.20-4.18 (m, 1H).  $^{31}\text{P}$  NMR (162 MHz,  $\text{D}_2\text{O}$ ):  $\delta$  -11.83. HRMS (ESI)  $m/z$  calculate for  $([\text{M}+\text{H}]^+)$ :  $\text{C}_{23}\text{H}_{28}\text{ClN}_8\text{O}_{13}\text{P}_2^+$ : 721.0934, Found: 721.0936.

**Compound 7d**  $^1\text{H}$  NMR (600 MHz,  $\text{D}_2\text{O}$ )  $\delta$  8.32 (s, 1H), 8.05 (s, 1H), 7.85 (s, 1H), 7.55 – 7.53 (m, 2H), 7.17-7.14 (m, 2H), 6.42 (d,  $J = 4.6$  Hz, 1H), 5.88 (d,  $J = 5.0$  Hz, 1H), 4.63 (t,  $J = 4.7$  Hz, 1H), 4.56 (s, 1H), 4.53-4.52 (m, 1H), 4.49-4.16 (m, 2H), 4.39 – 4.31 (m, 2H), 4.28 (s, 2H), 4.16-4.14 (m, 1H).  $^{31}\text{P}$  NMR (162 MHz,  $\text{D}_2\text{O}$ ):  $\delta$  -11.74. HRMS (ESI)  $m/z$  calculate for  $([\text{M}+\text{H}]^+)$ :  $\text{C}_{23}\text{H}_{28}\text{FN}_8\text{O}_{13}\text{P}_2^+$ : 705.1230, Found: 705.1231.

**Compound 7e**  $^1\text{H}$  NMR (600 MHz,  $\text{D}_2\text{O}$ )  $\delta$  8.32 (s, 1H), 8.03 (s, 1H), 7.86 (s, 1H), 7.47 (d,  $J = 7.9$  Hz, 2H), 6.98 (d,  $J = 7.9$  Hz, 2H), 6.42 (d,  $J = 4.2$  Hz, 1H), 5.86 (d,  $J = 4.6$  Hz, 1H), 4.63 (s, 1H), 4.56 (s, 1H), 4.53 – 4.47 (m, 2H), 4.45 (s, 1H), 4.36-4.33 (m, 2H), 4.28 (s, 2H), 4.16-4.14 (m, 1H), 3.89 (s, 3H).  $^{31}\text{P}$  NMR (162 MHz,  $\text{D}_2\text{O}$ ):  $\delta$  -11.24. HRMS (ESI)  $m/z$  calculate for  $([\text{M}+\text{H}]^+)$ :  $\text{C}_{24}\text{H}_{31}\text{N}_8\text{O}_{14}\text{P}_2^+$ : 717.1429, Found: 717.1431.

**Compound 7f**  $^1\text{H}$  NMR (600 MHz,  $\text{D}_2\text{O}$ )  $\delta$  8.35 (s, 1H), 8.21 (s, 1H), 7.98 (s, 1H), 7.49 (d,  $J = 7.7$  Hz, 2H), 7.20 (d,  $J = 7.5$  Hz, 2H), 6.12 (d,  $J = 4.9$  Hz, 1H), 5.78 (d,  $J = 4.8$  Hz, 1H), 4.65 (s, 1H), 4.52 (s, 1H), 4.48 (s, 1H), 4.43 (s, 1H), 4.39 (s, 1H), 4.31 – 4.23 (m, 4H), 4.19-4.17(m, 1H), 2.63-2.59 (m, 2H), 1.34 – 1.24 (m, 3H).  $^{31}\text{P}$  NMR (162 MHz,  $\text{D}_2\text{O}$ ):  $\delta$  -11.24. HRMS (ESI)  $m/z$  calculate for ( $[\text{M}+\text{H}]^+$ ):  $\text{C}_{25}\text{H}_{31}\text{N}_8\text{O}_{13}\text{P}_2^+$ : 715.1637, Found: 715.1639.

**Compound 7g**  $^1\text{H}$  NMR (600 MHz,  $\text{D}_2\text{O}$ )  $\delta$  8.45 (s, 1H), 8.31-8.32 (m, 1H), 8.18-8.17 (m, 1H), 8.14-8.12 (m, 2H), 7.57 (s, 2H), 7.29-7.25 (m, 1H), 6.06 (s, 1H), 5.90 (s, 1H), 4.52 (s, 1H), 4.43-4.39 (m, 2H), 4.30-4.29 (m, 3H), 4.17 (s, 2H), 4.11-4.06 (m, 2H), 3.28-3.25(m, 6H).  $^{31}\text{P}$  NMR (162 MHz,  $\text{D}_2\text{O}$ ):  $\delta$  -11.55. HRMS (ESI)  $m/z$  calculate for ( $[\text{M}+\text{H}]^+$ ):  $\text{C}_{30}\text{H}_{39}\text{N}_{10}\text{O}_{15}\text{P}_2\text{S}^+$ : 873.1787, Found: 873.1790

**Compound 7h**  $^1\text{H}$  NMR (600 MHz,  $\text{D}_2\text{O}$ )  $\delta$  8.32 (s, 1H), 7.72-7.67 (m, 2H), 7.56 (s, 1H), 7.37-7.36 (m, 1H), 7.33 (s, 1H), 7.21-7.20 (m, 1H), 6.50 (s, 1H), 5.94 (s, 1H), 5.90 (s, 1H), 5.30 (s, 2H), 4.60 (s, 1H), 4.55 (s, 1H), 4.47-4.48 (m, 2H), 4.33 (s, 1H), 4.27 (s, 1H), 4.24 (s, 2H), 4.14 (s, 2H).  $^{31}\text{P}$  NMR (162 MHz,  $\text{D}_2\text{O}$ ):  $\delta$  -11.59. HRMS (ESI)  $m/z$  calculate for ( $[\text{M}+\text{H}]^+$ ):  $\text{C}_{27}\text{H}_{31}\text{N}_8\text{O}_{16}\text{P}_2^+$ : 785.1328, Found:785.1329.

**Compound 7i**  $^1\text{H}$  NMR (400 MHz,  $\text{D}_2\text{O}$ ):  $\delta$  8.39 (s, 1H), 8.20 (s, 1H), 8.10(s, 1H), 7.66-7.64(m, 1H), 6.01-5.99 (m, 1H), 5.24 (s, 2H), 4.66-4.64 (m, 2H), 4.53–4.49 (m, 2H), 4.45-4.42 (m, 1H), 4.36 (s, 1H), 4.28–4.24 (m, 3H), 4.12-4.11 (m, 1H), 3.91-3.87 (m, 3H), 2.64-2.62 (m, 3H).  $^{31}\text{P}$  NMR (162 MHz,  $\text{D}_2\text{O}$ ):  $\delta$  -11.56. HRMS (ESI)  $m/z$  calculate for ( $[\text{M}+\text{H}]^+$ ):  $\text{C}_{27}\text{H}_{35}\text{N}_8\text{O}_{16}\text{P}_2^+$ : 789.1641, Found: 789.1642.

Compound **6**  $^1\text{H}$ ,  $^{31}\text{P}$  and  $^{13}\text{C}$  NMR

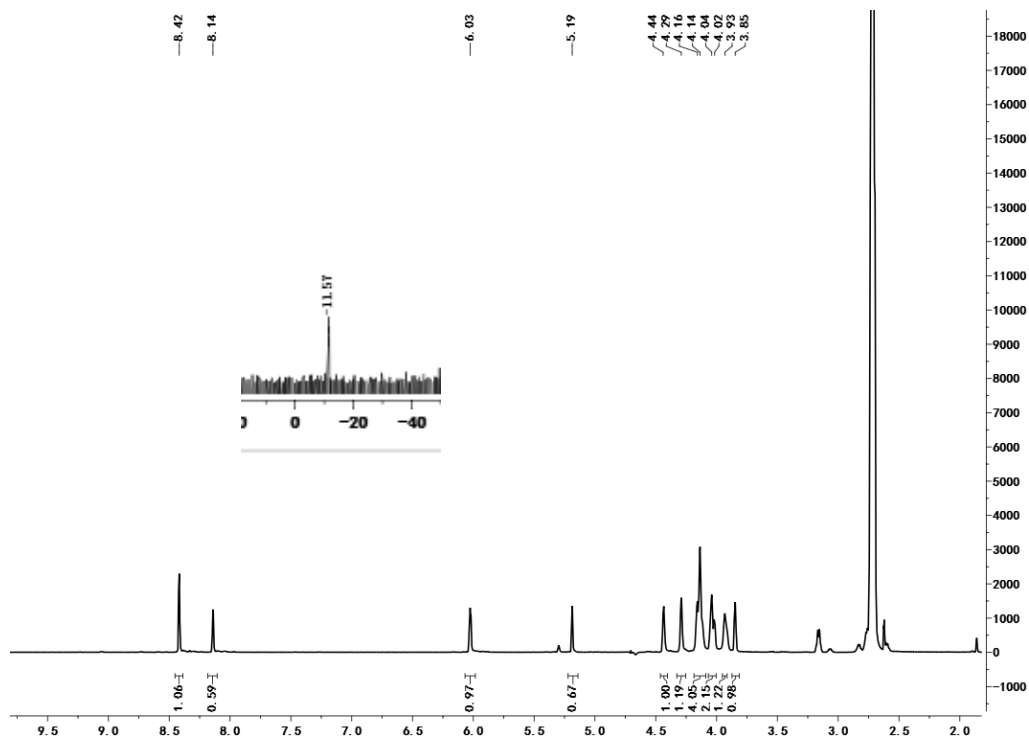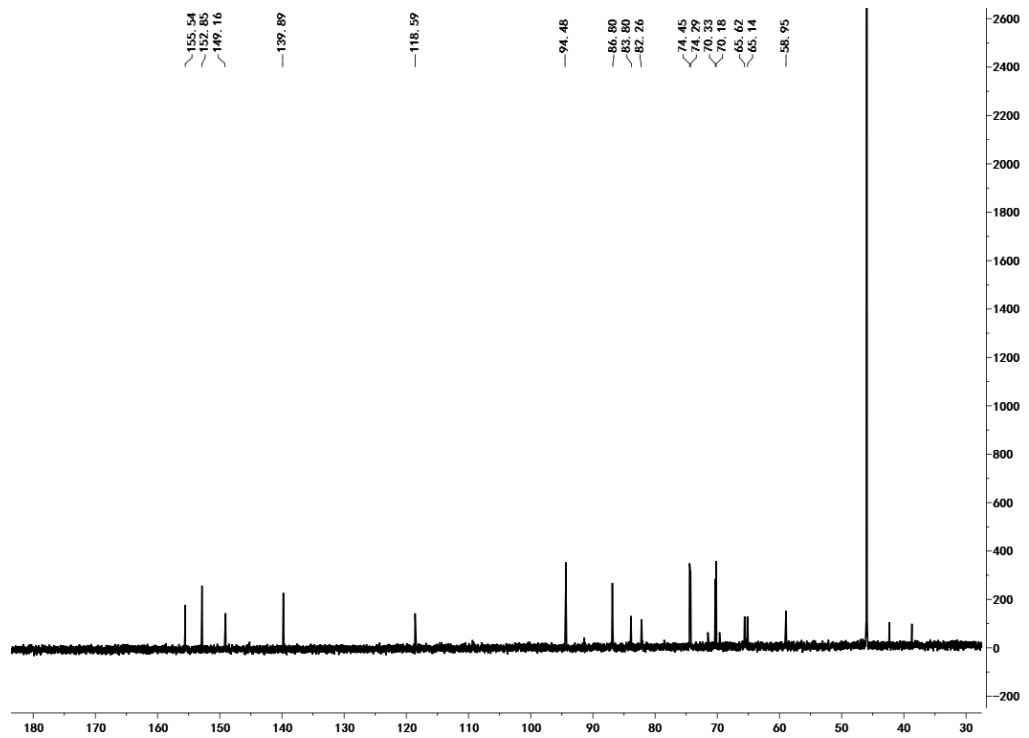

Compound 6  $^1\text{H}$ - $^1\text{H}$  COSY

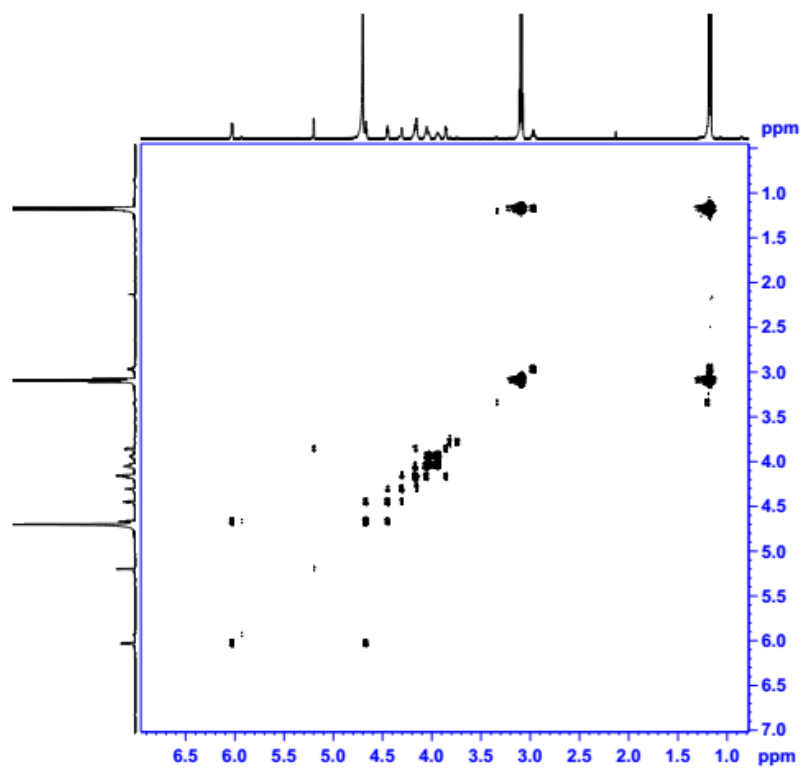

Compound 7a <sup>1</sup>H and <sup>31</sup>P NMR

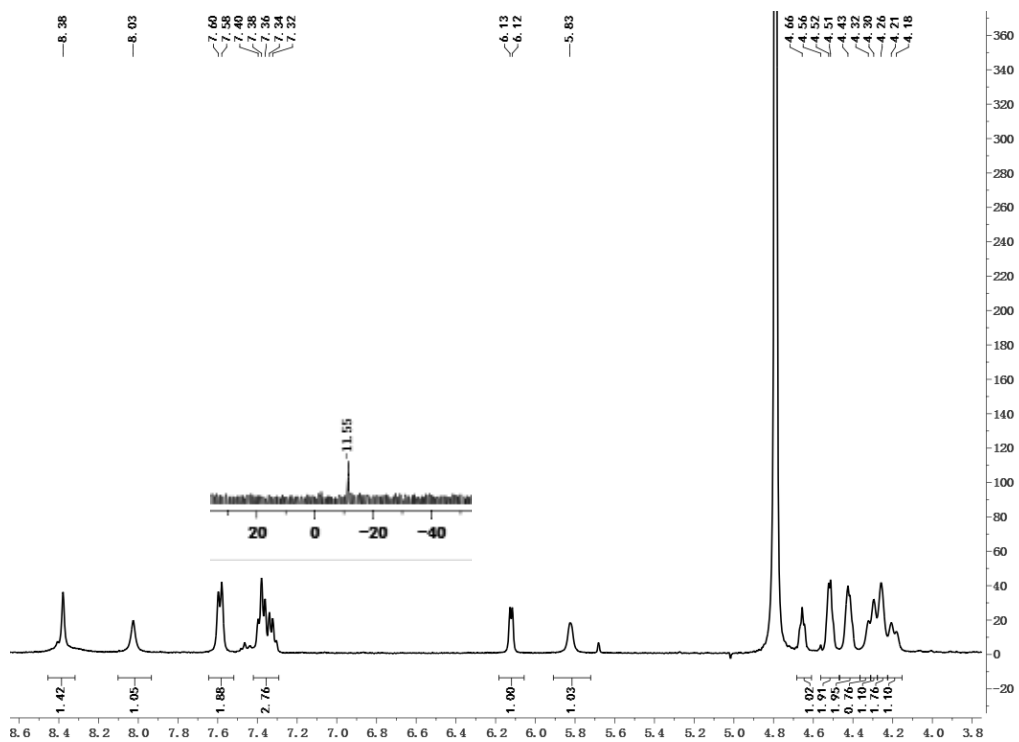

Compound 7b <sup>1</sup>H and <sup>31</sup>P NMR

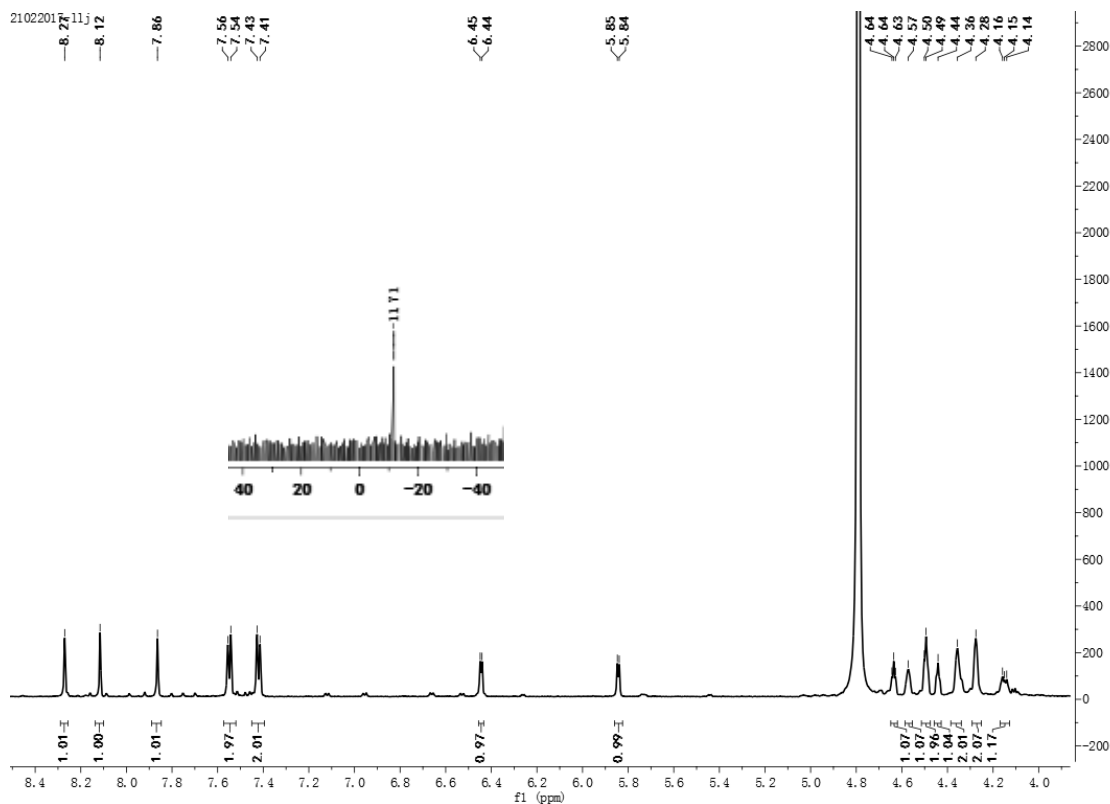

### Compound 7c <sup>1</sup>H and <sup>31</sup>P NMR

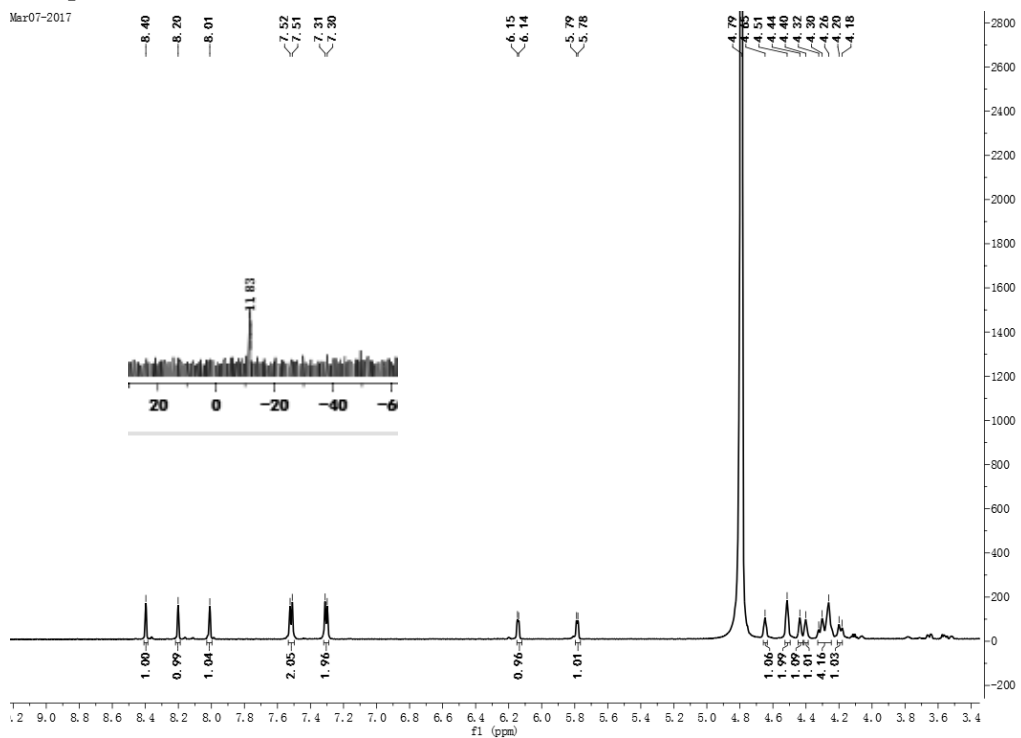

### Compound 7d <sup>1</sup>H and <sup>31</sup>P NMR

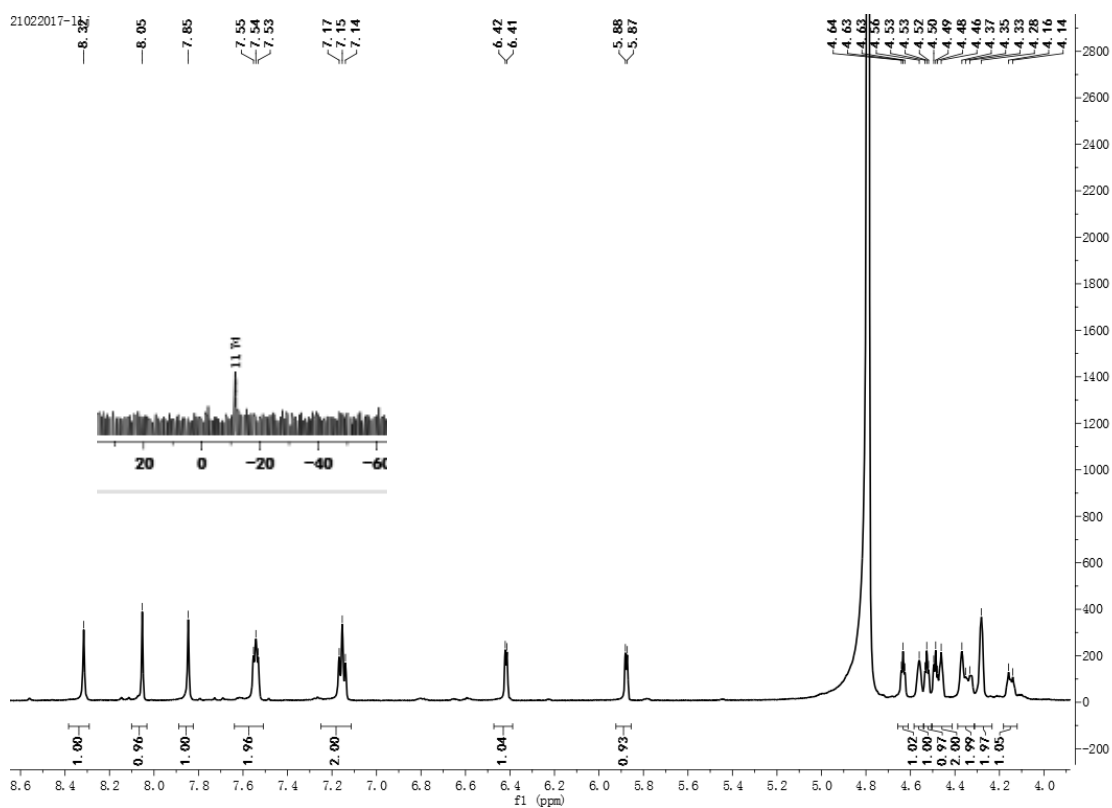



Compound 7e <sup>1</sup>H and <sup>31</sup>P NMR

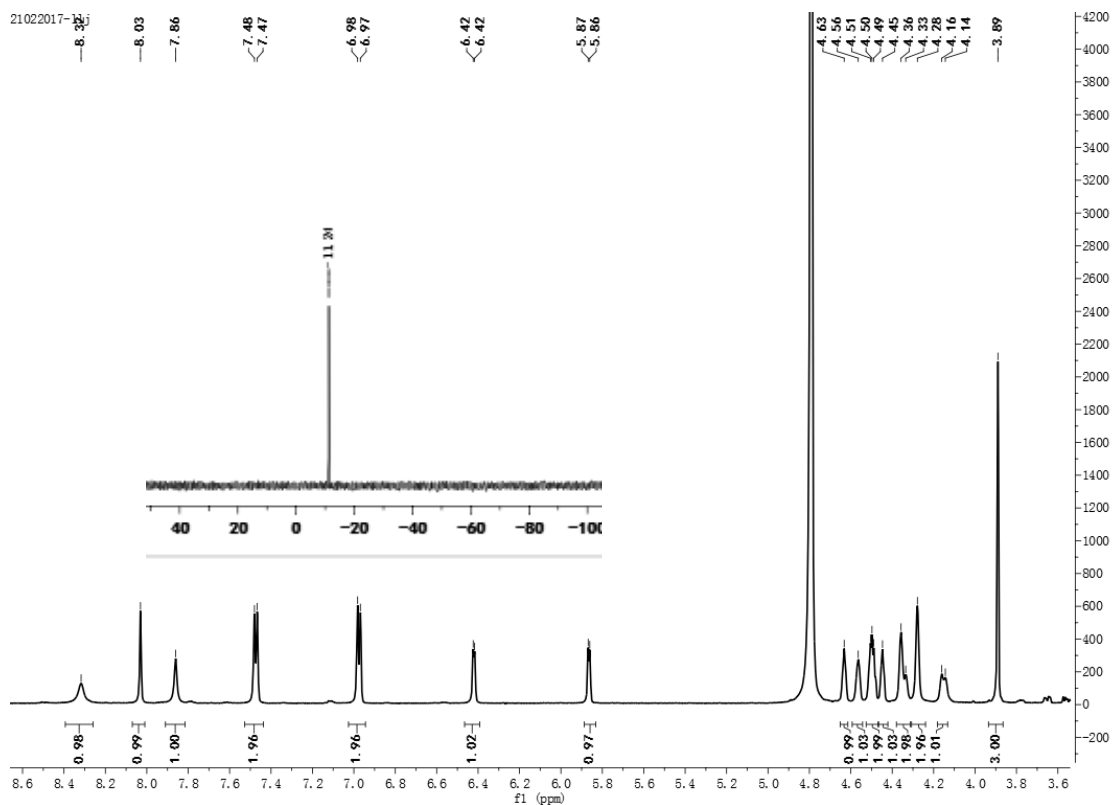

Compound 7f <sup>1</sup>H and <sup>31</sup>P NMR

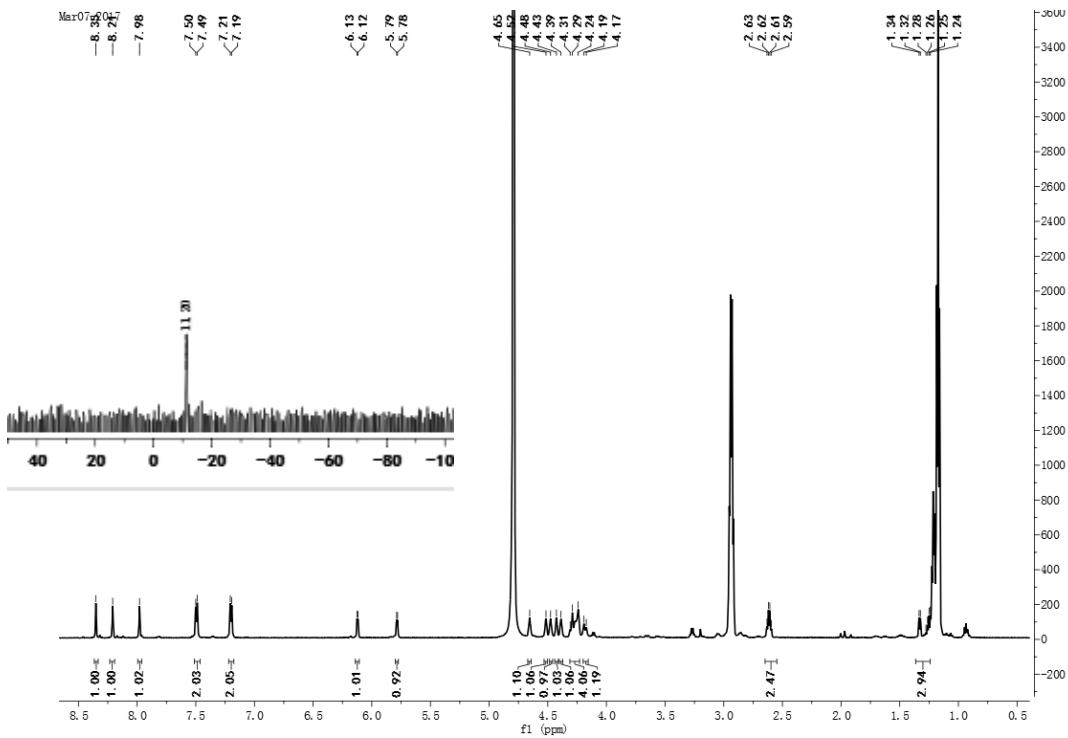

### Compound 7g <sup>1</sup>H and <sup>31</sup>P NMR

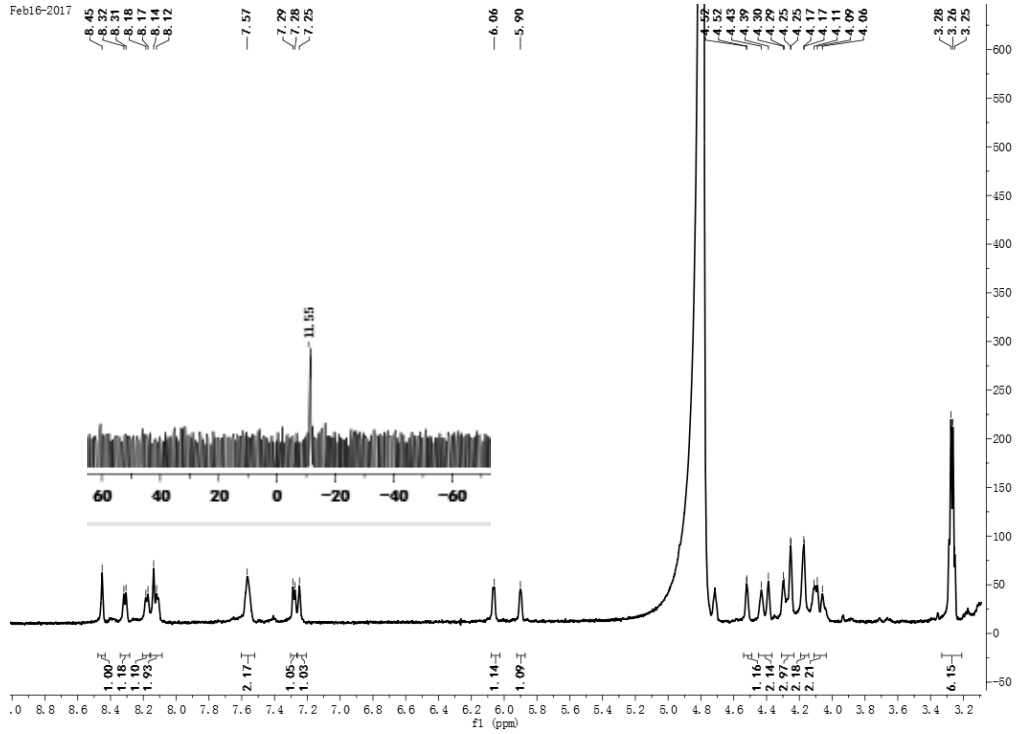

### Compound 7h <sup>1</sup>H and <sup>31</sup>P NMR

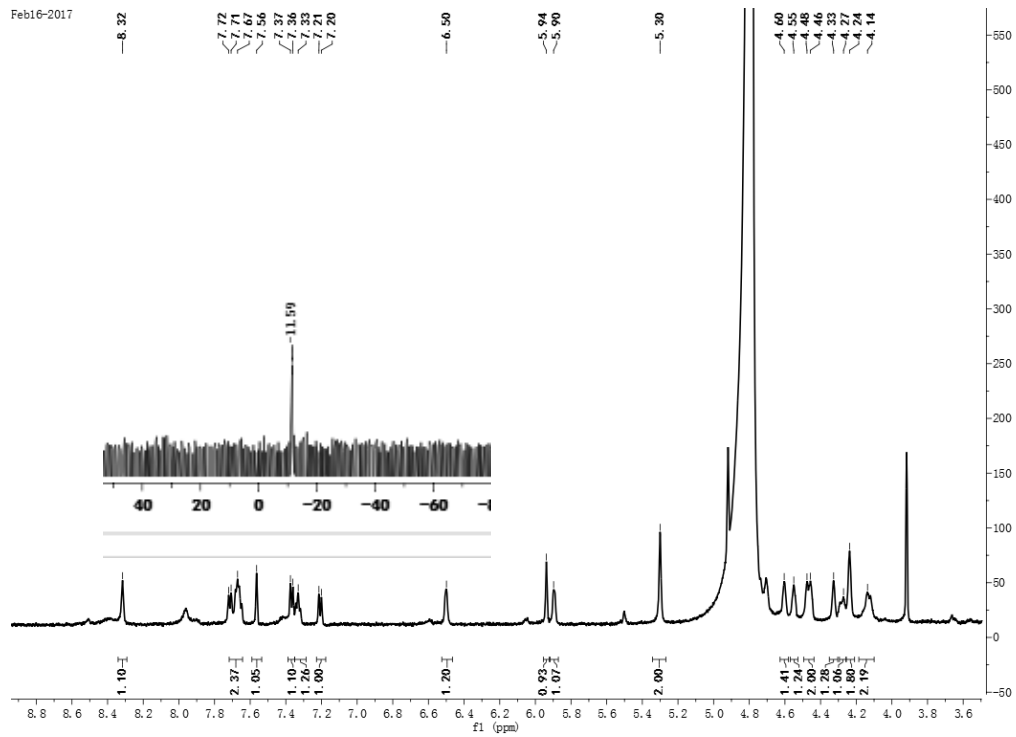

Compound 7i <sup>1</sup>H and <sup>31</sup>P NMR

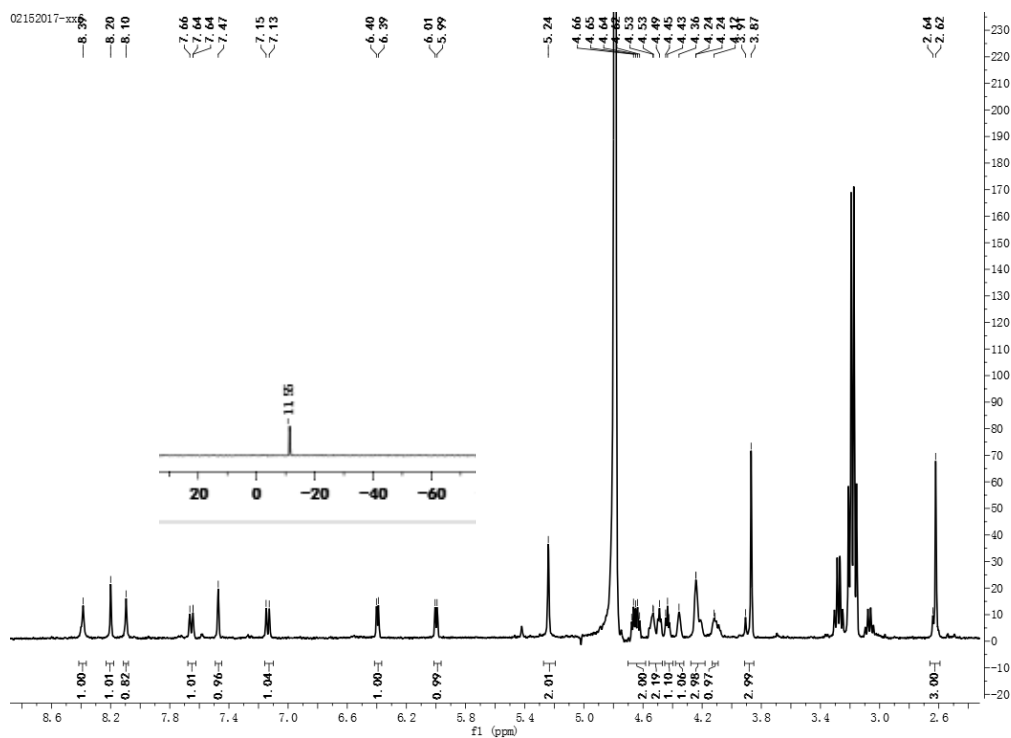

Compound 9 <sup>1</sup>H NMR and <sup>31</sup>P NMR

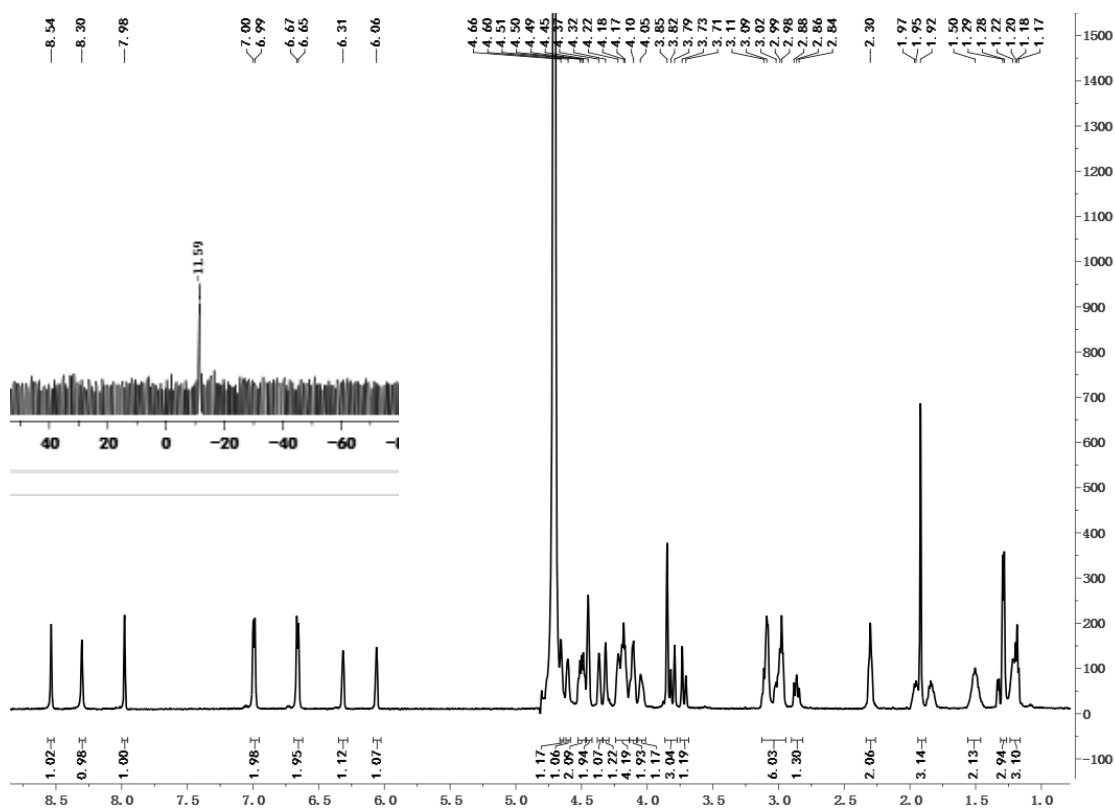

## Reference

- [1] L. Li, S. Ding, Y. Yang, A. Zhu, *Chem.Eur.J.*, **2017**, *23*, 1166-1172.
